# Supplementary material for: Infection with hepatitis C virus depends on TACSTD2, a regulator of claudin-1 and occludin highly downregulated in hepatocellular carcinoma
Source: PubMed Central journal article supplement (PMC5882150; doi:10.1371/journal.ppat.1006916), 2018-03-14
Supplement: ppat.1006916.s001.pdf [file ppat.1006916.s001.pdf]

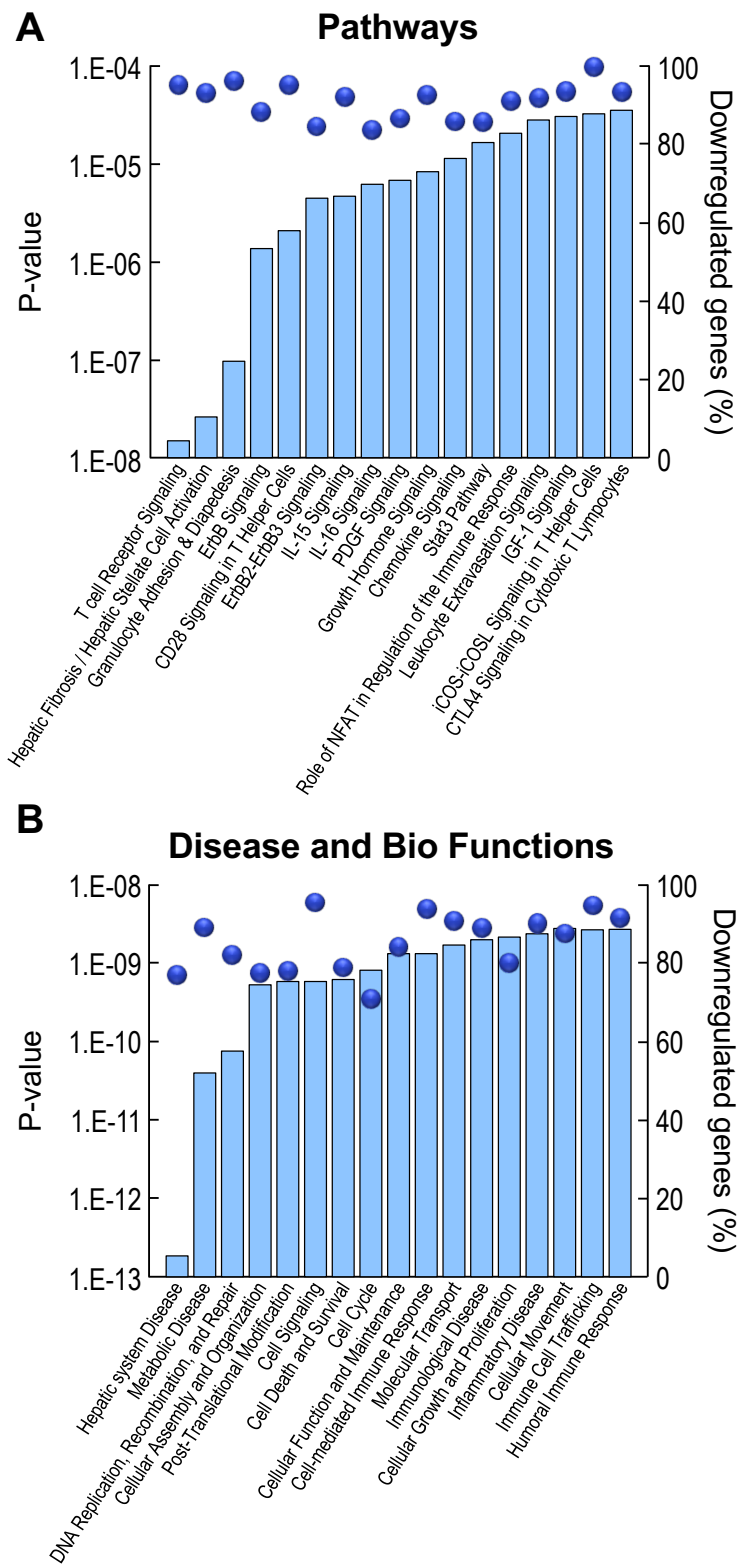

**S1 Fig. Functional analysis of genes differentially expressed in HCC-associated HCV.** Top-scored pathways (A), and diseases and bio functions (B) identified by IPA database (Ingenuity Pathway Analysis, <http://www.ingenuity.com/>) from the set of genes differentially expressed in HCV-associated HCC. Columns display the P-values calculated by Fisher's exact test (left axis). Dots indicate the percentage of downregulated genes (right axis). All categories show a striking majority (on average 90%) of downregulated genes.
