# Supplementary material for: Infection with hepatitis C virus depends on TACSTD2, a regulator of claudin-1 and occludin highly downregulated in hepatocellular carcinoma
Source: PubMed Central journal article supplement (PMC5882150; doi:10.1371/journal.ppat.1006916), 2018-03-14
Supplement: ppat.1006916.s002.pdf [file ppat.1006916.s002.pdf]

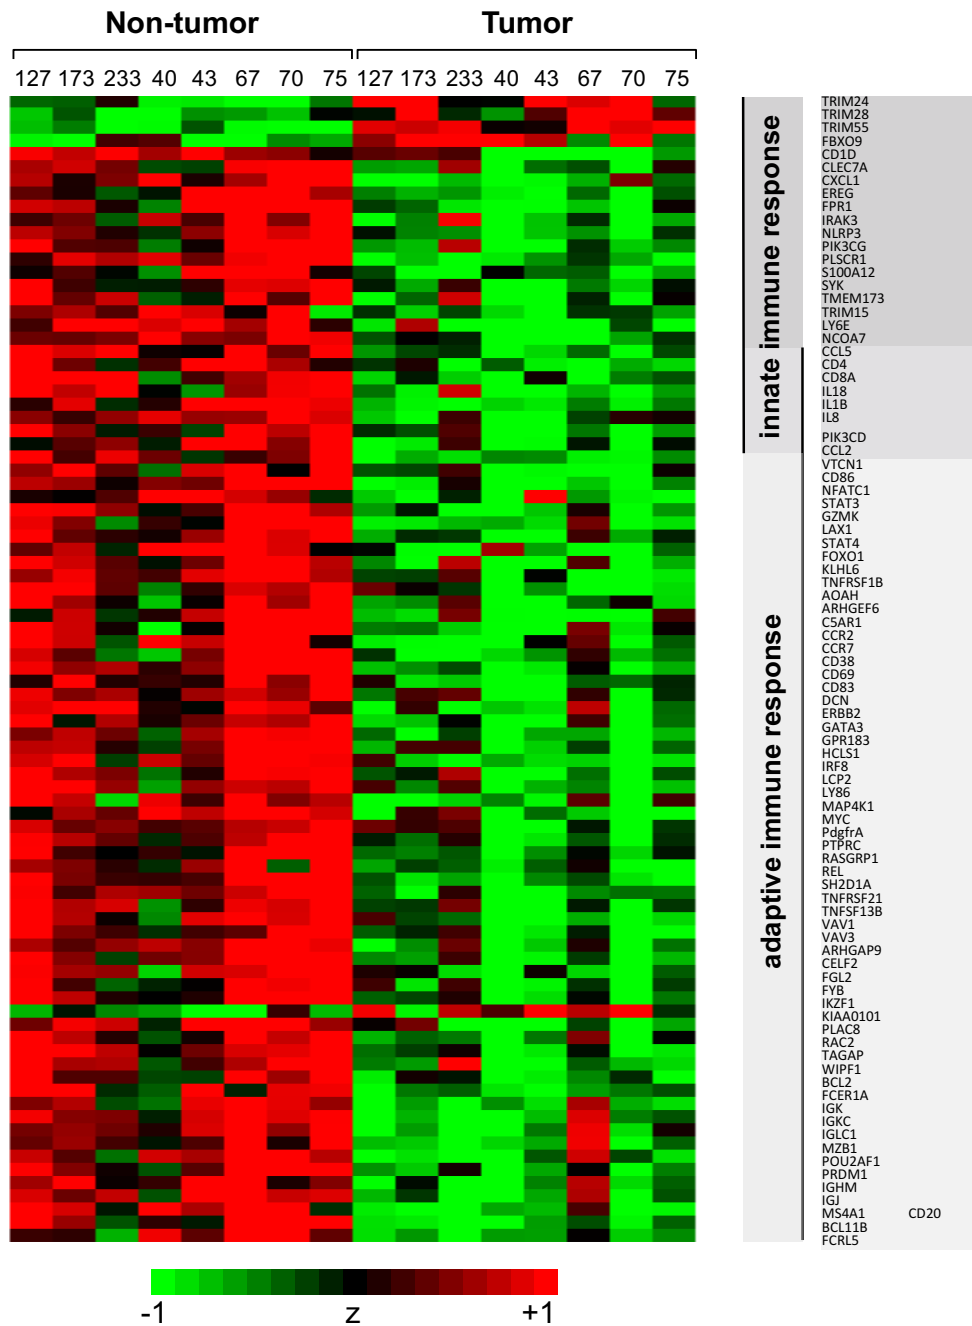

**S2 Fig. Heatmap of 87 immune genes differentially expressed in liver samples from tumor and nontumorous tissues of 8 patients with HCV-associated HCC.** Gene expression levels were log<sub>2</sub>-transformed and row-wise standardized. Up-regulated genes are shown in shades of red; downregulated genes in shades of green. The dynamic range of colors is  $\pm 1$  SD.
