# Supplementary material for: Infection with hepatitis C virus depends on TACSTD2, a regulator of claudin-1 and occludin highly downregulated in hepatocellular carcinoma
Source: PubMed Central journal article supplement (PMC5882150; doi:10.1371/journal.ppat.1006916), 2018-03-14
Supplement: ppat.1006916.s003.pdf [file ppat.1006916.s003.pdf]

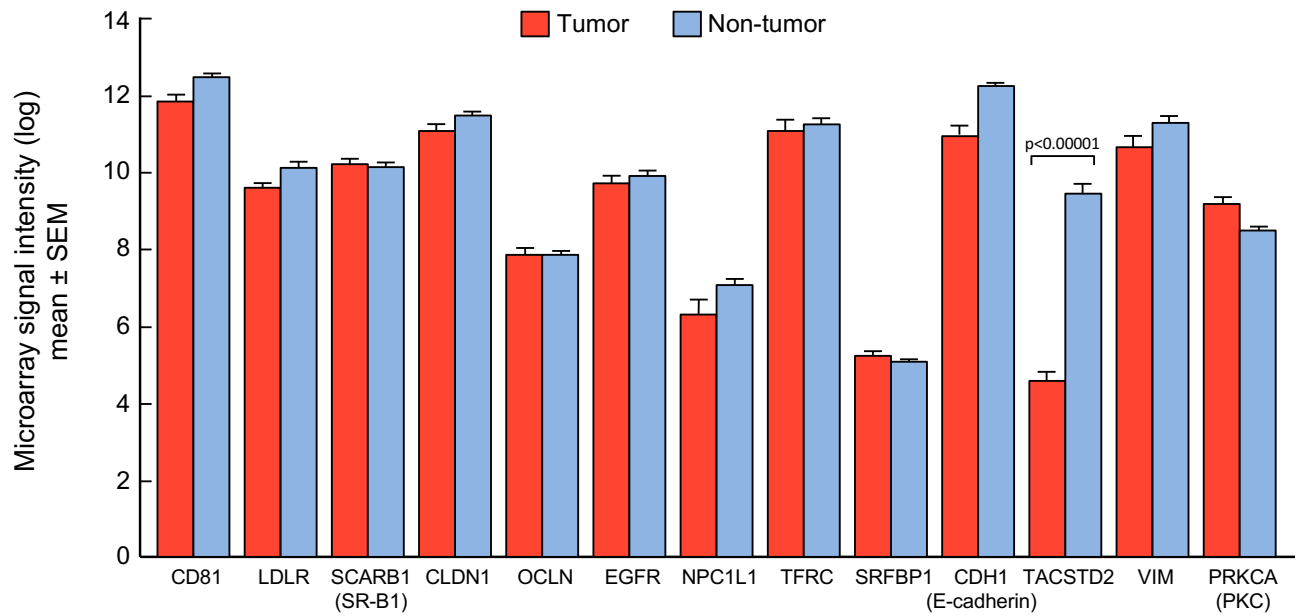

**S3 Fig.** Expression levels of known host factors involved in regulating HCV entry in liver samples from tumor (red bars) and nontumorous tissues (blue bars) of 8 patients with HCV-associated HCC. Statistical significance (FDR 5%) was assessed by multivariate permutations. None of the host factors analyzed was differentially expressed, with the exception of TACSTD2, which was significantly downregulated within the tumor ( $P < 0.00001$ ).
