# Supplementary material for: Infection with hepatitis C virus depends on TACSTD2, a regulator of claudin-1 and occludin highly downregulated in hepatocellular carcinoma
Source: PubMed Central journal article supplement (PMC5882150; doi:10.1371/journal.ppat.1006916), 2018-03-14
Supplement: ppat.1006916.s004.pdf [file ppat.1006916.s004.pdf]

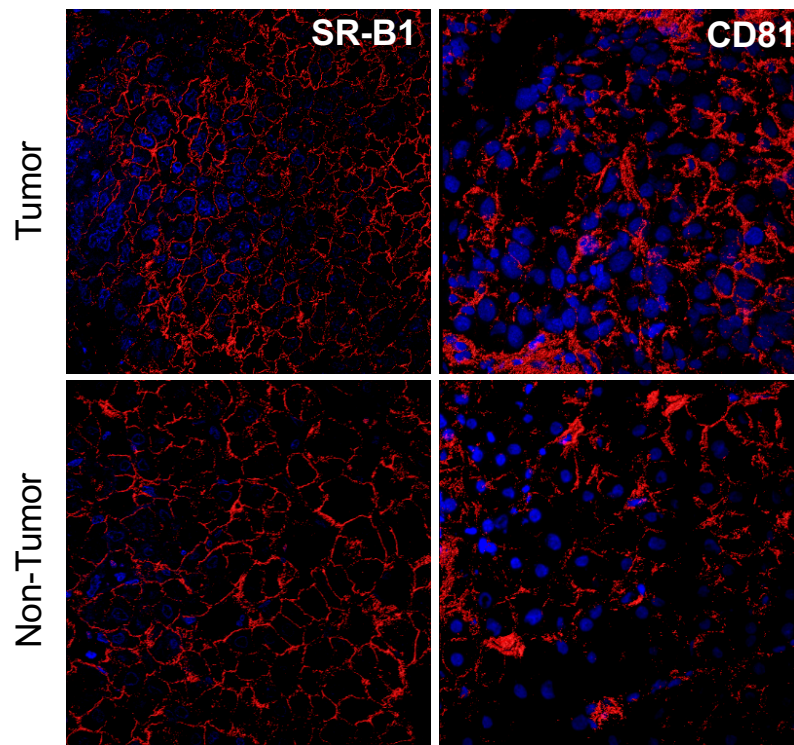

**S4 Fig. Visualization of SRB1 and CD81 distribution in tumor and nontumorous tissue of a representative patient by immunofluorescence staining.** To enhance the structural features, SR-B1 and CD81 are shown as red surface rendering, while nuclei are shown as blue volume rendering. No significant difference was observed in the distribution of SR-B1 and CD81 between the tumor and nontumorous tissue.
