# Supplementary material for: Infection with hepatitis C virus depends on TACSTD2, a regulator of claudin-1 and occludin highly downregulated in hepatocellular carcinoma
Source: PubMed Central journal article supplement (PMC5882150; doi:10.1371/journal.ppat.1006916), 2018-03-14
Supplement: ppat.1006916.s005.pdf [file ppat.1006916.s005.pdf]

**A**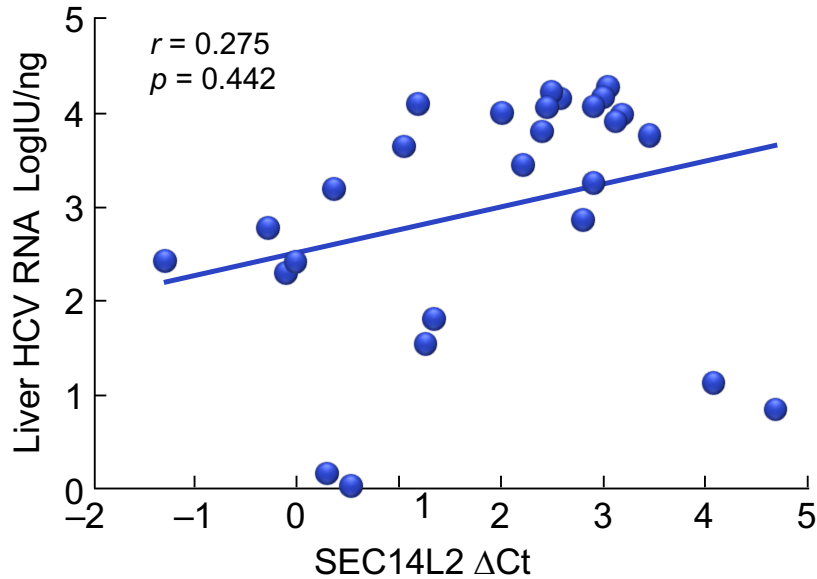**B**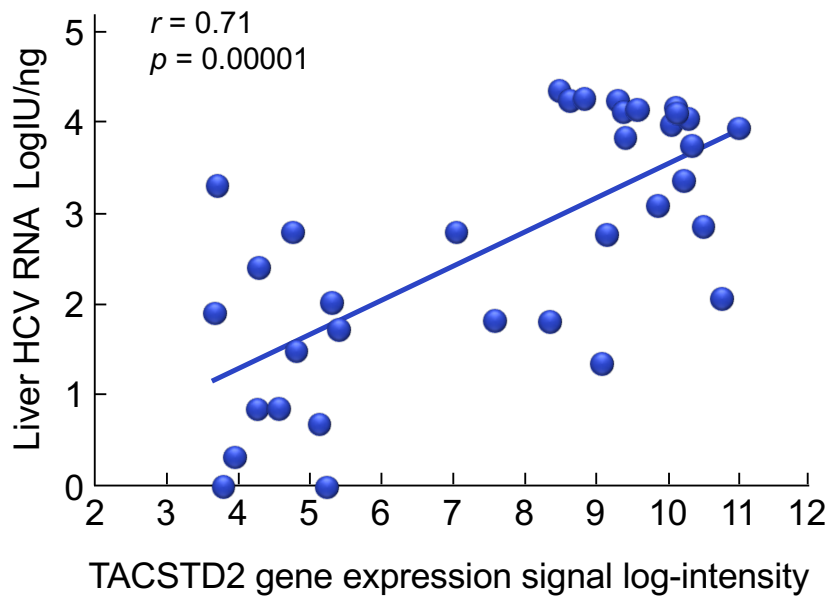

**S5 Fig. SEC14L2 expression, TACSTD2 expression, and HCV RNA concentration.** (A) No correlation was found between SEC14L2 gene expression and HCV replication levels in tumor and nontumorous tissue. (B) A significant correlation was found between TACSTD2 gene expression and HCV replication levels in tumor and nontumorous tissue.
