# Supplementary material for: Infection with hepatitis C virus depends on TACSTD2, a regulator of claudin-1 and occludin highly downregulated in hepatocellular carcinoma
Source: PubMed Central journal article supplement (PMC5882150; doi:10.1371/journal.ppat.1006916), 2018-03-14
Supplement: ppat.1006916.s006.pdf [file ppat.1006916.s006.pdf]

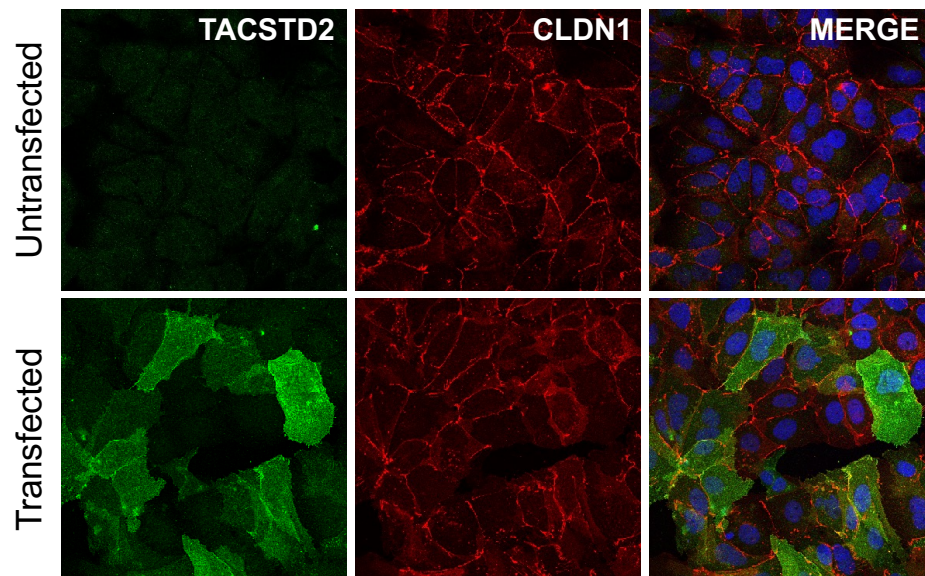

**S6 Fig. Localization of TACSTD2 (green) and CLDN1 (red) in untransfected parental and TACSTD2-overexpressing Huh7.5 cells by immunofluorescence staining.** In TACSTD2-overexpressing cells both proteins are co-localized along the cellular membrane.
