# Supplementary material for: Infection with hepatitis C virus depends on TACSTD2, a regulator of claudin-1 and occludin highly downregulated in hepatocellular carcinoma
Source: PubMed Central journal article supplement (PMC5882150; doi:10.1371/journal.ppat.1006916), 2018-03-14
Supplement: ppat.1006916.s012.pdf [file ppat.1006916.s012.pdf]

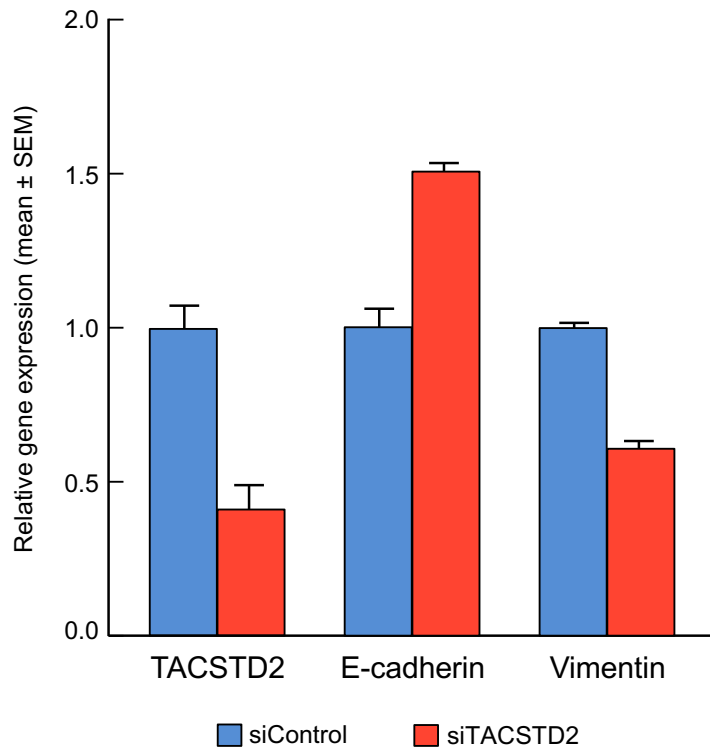

**S12 Fig. Effect of TACSTD2 gene silencing on E-cadherin and vimentin mRNA expression.** Quantitative RT-PCR data showing relative levels of TACSTD2, E-cadherin and vimentin mRNA in siControl- and siTACSTD2-treated parental Huh 7.5 cells. Data are expressed as  $2^{-\Delta\Delta C_T}$ , where  $\Delta\Delta C_T$  is the average difference between the siTACSTD2  $\Delta C_T$  and siControl  $\Delta C_T$ . An increase in E-cadherin and decrease in vimentin levels were observed following siTACSTD2 gene silencing.
