# Supplementary material for: Infection with hepatitis C virus depends on TACSTD2, a regulator of claudin-1 and occludin highly downregulated in hepatocellular carcinoma
Source: PubMed Central journal article supplement (PMC5882150; doi:10.1371/journal.ppat.1006916), 2018-03-14
Supplement: ppat.1006916.s014.pdf [file ppat.1006916.s014.pdf]

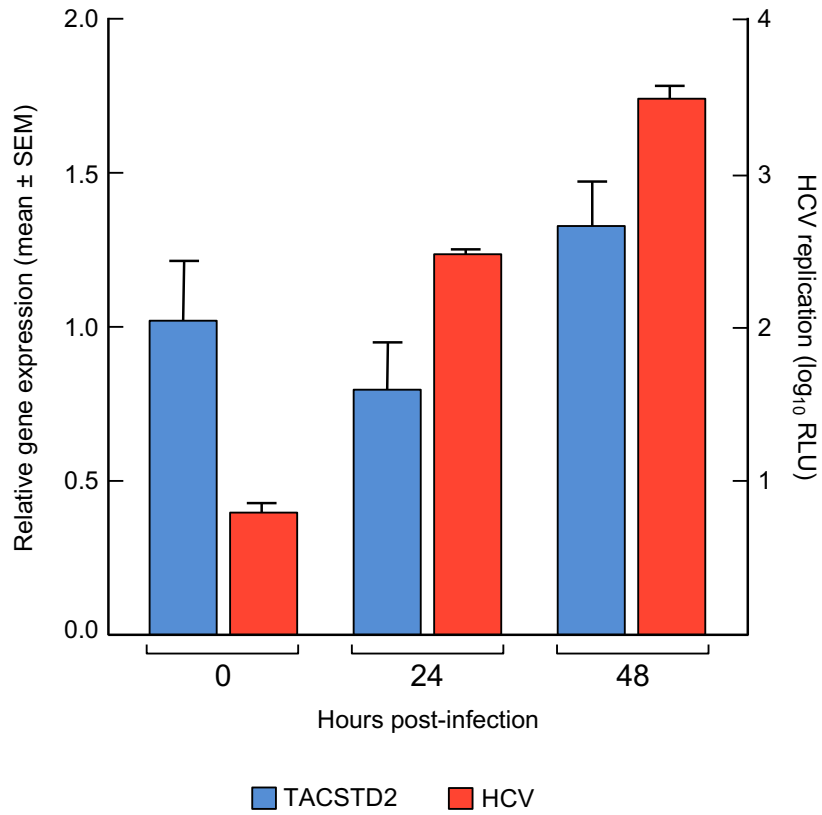

**S14 Fig. Effect of HCV infection on TACSTD2 expression.** Quantitative RT-PCR data showing relative levels of TACSTD2 and HCV replication during the course of HCV infection at time 0, 24 and 48 hours after infection. Data are expressed as  $2^{-\Delta\Delta C_T}$ , where  $\Delta\Delta C_T$  is the average difference between each time point and the baseline (time 0).
